# Supplementary material for: Impact of Plasmodium falciparum pfhrp2 and pfhrp3 gene deletions on malaria control worldwide: a systematic review and meta-analysis
Source: PubMed Central journal article supplement (PMC8220794; doi:10.1186/s12936-021-03812-0), 2021-06-22
Supplement: 12936_2021_3812_MOESM2_ESM.pdf [file 12936_2021_3812_MOESM2_ESM.pdf]

**Table S2.** Pooled prevalence of *pfhrp2*, *pfhrp3* and *pfhrp2/3* deletions among all *P. falciparum* cases by WHO region, population symptomatology, age of population and collection season.

|                                            | N             | <i>pfhrp2</i> deletions |              | I <sup>2</sup><br>(%) | N                  | <i>pfhrp3</i> deletions |               | I <sup>2</sup><br>(%) | N             | <i>pfhrp2/3</i> deletions |              | I <sup>2</sup><br>(%) |
|--------------------------------------------|---------------|-------------------------|--------------|-----------------------|--------------------|-------------------------|---------------|-----------------------|---------------|---------------------------|--------------|-----------------------|
|                                            |               | P<br>(%)                | 95% CI       |                       |                    | P<br>(%)                | 95% CI        |                       |               | P<br>(%)                  | 95% CI       |                       |
| <b>WHO region</b>                          |               |                         |              |                       |                    |                         |               |                       |               |                           |              |                       |
| Africa                                     | 18            | 3.77                    | 2.61 – 5.41  | 80.9                  | 15                 | 4.22                    | 1.78 – 9.68   | 96.7                  | 11            | 3.63                      | 2.03 – 6.41  | 84.0                  |
| Central and South America                  | 9             | 13.19                   | 8.42 – 20.09 | 83.7                  | 7                  | 37.05                   | 27.72 – 47.47 | 88.4                  | 6             | 5.66                      | 2.87 – 10.87 | 75.0                  |
| Asia                                       | 6             | 4.82                    | 2.28 – 9.91  | 89.0                  | 3                  | 1.67                    | 0.18 – 13.85  | 92.6                  | 5             | 2.20                      | 0.97 – 4.94  | 79.9                  |
| <i>Cochran's Q (df)</i>                    | 18.10 (2)     |                         |              |                       | 33.40 (2)          |                         |               |                       | 3.09 (2)      |                           |              |                       |
| <i>p-value</i>                             | <b>0.0001</b> |                         |              |                       | <b>&lt; 0.0001</b> |                         |               |                       | 0.2135        |                           |              |                       |
| <b>Symptomatology of sample population</b> |               |                         |              |                       |                    |                         |               |                       |               |                           |              |                       |
| Symptomatic                                | 12            | 8.42                    | 5.26 – 13.19 | 82.4                  | 10                 | 19.30                   | 9.12 – 36.32  | 97.4                  | 6             | 4.61                      | 2.09 – 9.86  | 89.8                  |
| Asymptomatic                               | 1             | 9.88                    | 5.02 – 13.19 | NA                    | 2                  | 6.03                    | 0.10 – 79.69  | 88.6                  | 2             | 3.94                      | 0.19 – 46.57 | 79.8                  |
| General (Mixed)                            | 20            | 4.35                    | 2.90 – 6.47  | 90.4                  | 13                 | 4.24                    | 1.72 – 10.07  | 82.4                  | 14            | 2.68                      | 1.55 – 4.58  | 79.6                  |
| <i>Cochran's Q (df)</i>                    | 6.55          |                         |              |                       | 6.83 (2)           |                         |               |                       | 1.27 (2)      |                           |              |                       |
| <i>p-value</i>                             | 0.0379        |                         |              |                       | 0.0329             |                         |               |                       | 0.5312        |                           |              |                       |
| <b>Age of sample population</b>            |               |                         |              |                       |                    |                         |               |                       |               |                           |              |                       |
| Children                                   | 6             | 8.31                    | 5.11 – 13.22 | 77.2                  | 7                  | 29.45                   | 17.30 – 45.45 | 93.1                  | 6             | 7.41                      | 4.26 – 12.58 | 64.6                  |
| General Population                         | 27            | 4.56                    | 3.05 – 6.77  | 90.6                  | 18                 | 4.57                    | 2.11 – 9.63   | 97.3                  | 16            | 2.77                      | 1.69 – 4.52  | 85.5                  |
| <i>Cochran's Q (df)</i>                    | 3.54          |                         |              |                       | 16.12 (1)          |                         |               |                       | 6.80 (1)      |                           |              |                       |
| <i>p-value</i>                             | 0.0600        |                         |              |                       | <b>&lt; 0.0001</b> |                         |               |                       | 0.0091        |                           |              |                       |
| <b>Collection season</b>                   |               |                         |              |                       |                    |                         |               |                       |               |                           |              |                       |
| High transmission                          | 10            | 4.34                    | 2.35 – 7.87  | 88.0                  | 7                  | 4.68                    | 1.05 – 18.58  | 93.5                  | 8             | 1.48                      | 0.78 – 2.77  | 65.2                  |
| Low transmission                           | 1             | 5.34                    | 4.37 – 6.50  | NA                    | 2                  | 13.30                   | 2.11 – 52.26  | 99.3                  | 2             | 7.80                      | 2.81 – 19.83 | 96.3                  |
| Both or annual transmission                | 22            | 5.69                    | 3.67 – 8.71  | 90.3                  | 16                 | 12.52                   | 7.46 – 20.27  | 90.3                  | 16            | 5.63                      | 3.51 – 8.91  | 69.0                  |
| <i>Cochran's Q (df)</i>                    | 0.53          |                         |              |                       | 1.67 (2)           |                         |               |                       | 13.34 (2)     |                           |              |                       |
| <i>p-value</i>                             | 0.7679        |                         |              |                       | 0.4337             |                         |               |                       | <b>0.0013</b> |                           |              |                       |

N: Number of articles included; P: Prevalence (%), 95% CI: 95% Confidence Interval; I<sup>2</sup>: I – square, index of heterogeneity; *Cochran's Q* : Indicates the heterogeneity between subgroups.
