# Supplementary material for: Impact of Plasmodium falciparum pfhrp2 and pfhrp3 gene deletions on malaria control worldwide: a systematic review and meta-analysis
Source: PubMed Central journal article supplement (PMC8220794; doi:10.1186/s12936-021-03812-0), 2021-06-22
Supplement: 12936_2021_3812_MOESM6_ESM.pdf [file 12936_2021_3812_MOESM6_ESM.pdf]

**Figure S4. Assessment of inter-study heterogeneity for the *pfhrp2* deletion analysis.** The combination of both analyses resulted in the exclusion of the following articles: Berhane A et al. (2018), among studies from health facilities, and Gupta H et al. (2017), among studies in the general population.

**Fig. S4a, S4b Baujat plot for studies included in the meta-analysis.** The horizontal axis indicates the contribution of each study to the overall heterogeneity (measured by Cochran's Q), therefore studies on the right-hand side increase the heterogeneity more. The vertical axis indicates the influence of each study on the pooled proportion. Studies at the top have a greater influence on the pooled result.

Fig. S4a. Baujat plot for studies included in the meta-analysis of *pfhrp2* deletions among samples from health facilities.

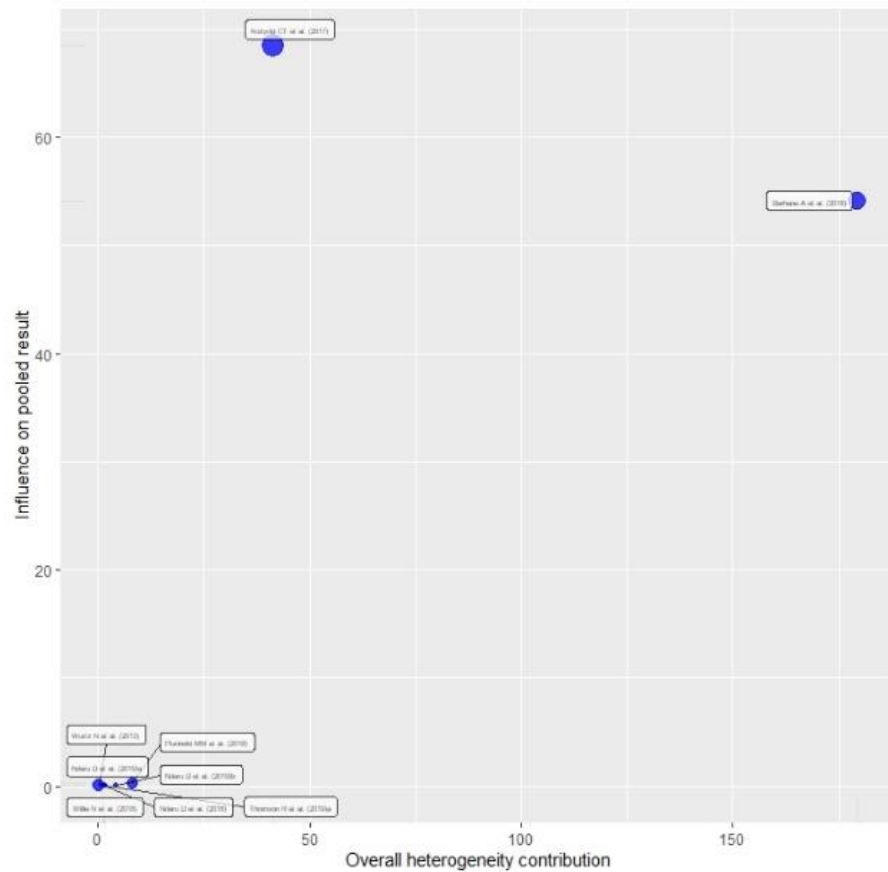

**Fig. S4c, S4d. Forest plot for *pfhrp2* deletion prevalence according to the outliers analysis.** All results whose confidence interval did not overlap with the prediction interval were excluded. These articles had a relative weight of 0%.

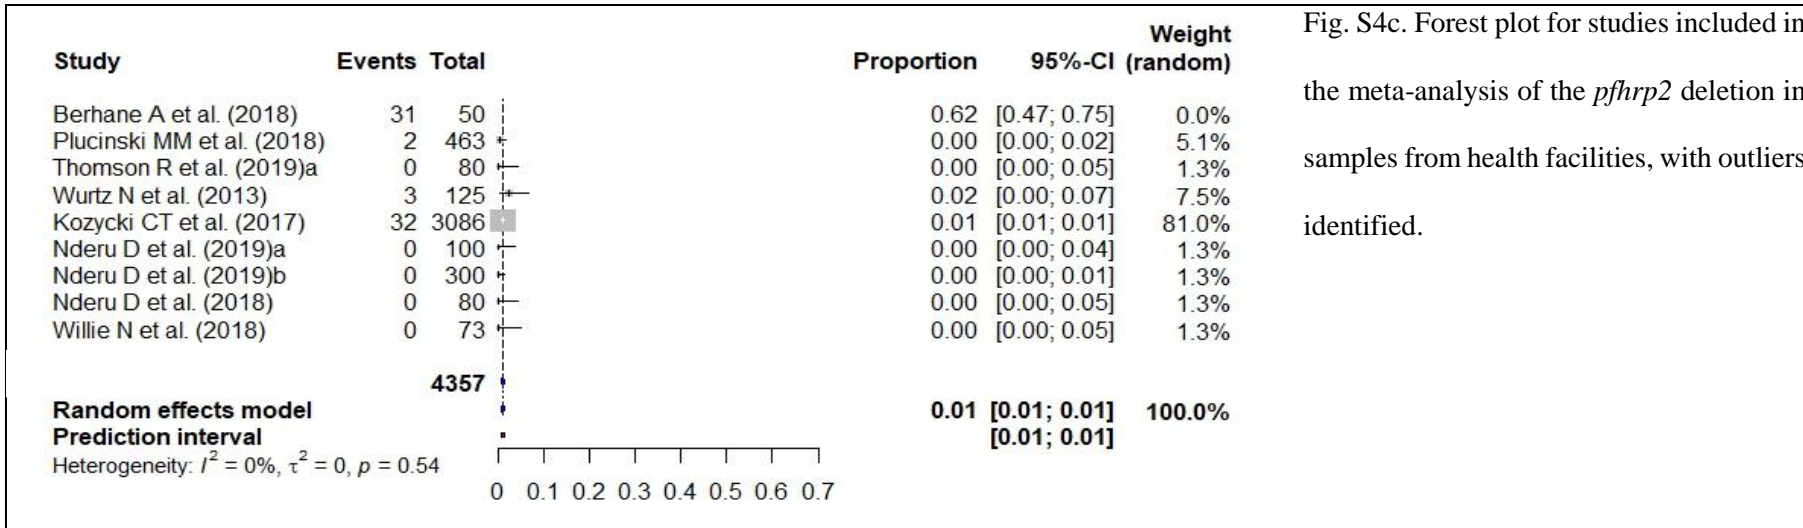

Fig. S4c. Forest plot for studies included in the meta-analysis of the *pfhrp2* deletion in samples from health facilities, with outliers identified.

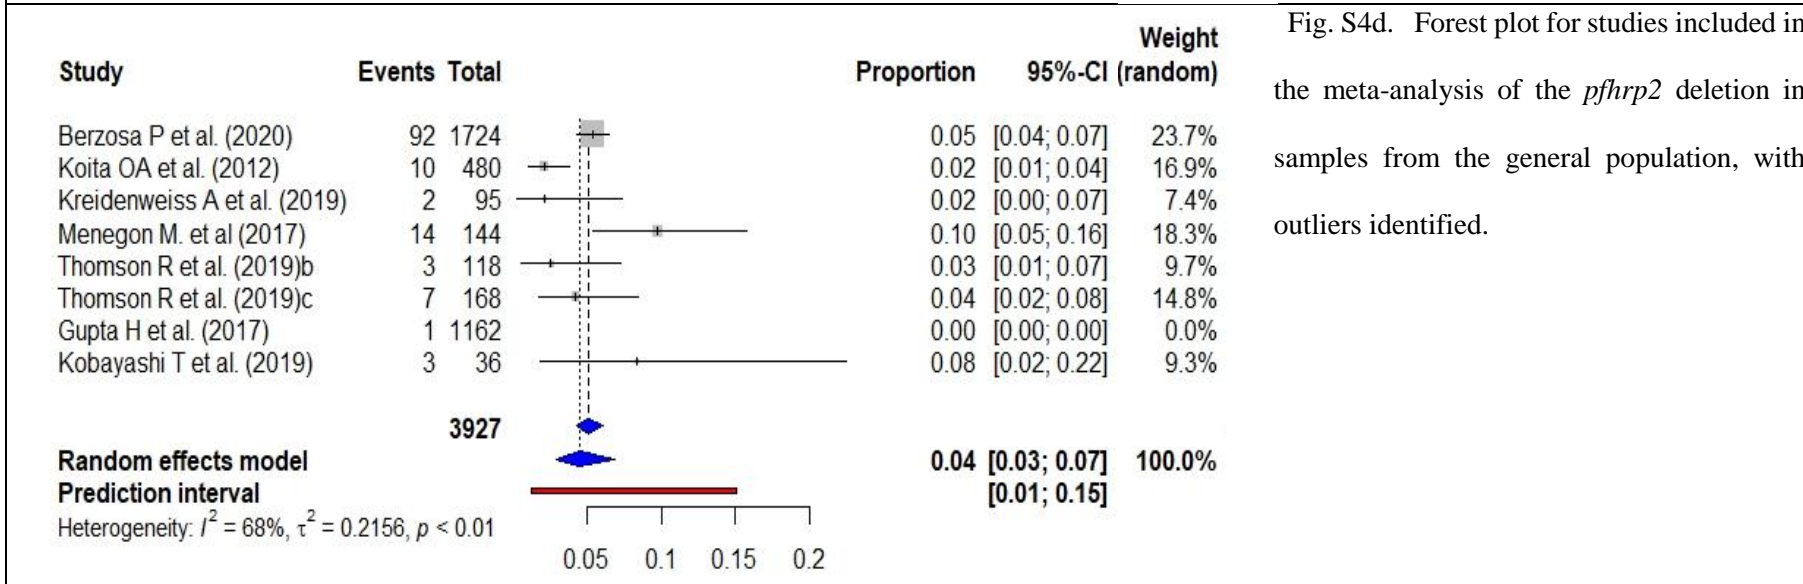

Fig. S4d. Forest plot for studies included in the meta-analysis of the *pfhrp2* deletion in samples from the general population, with outliers identified.
