# Supplementary material for: Impact of Plasmodium falciparum pfhrp2 and pfhrp3 gene deletions on malaria control worldwide: a systematic review and meta-analysis
Source: PubMed Central journal article supplement (PMC8220794; doi:10.1186/s12936-021-03812-0), 2021-06-22
Supplement: 12936_2021_3812_MOESM7_ESM.pdf [file 12936_2021_3812_MOESM7_ESM.pdf]

**Figure S5. Assessment of inter-study heterogeneity for the *pfhrp3* deletion analysis.** The combination of both analyses resulted in the exclusion of the following articles: Berhane A et al. (2018), among studies from health facilities, and Menegon et al. (2017), among studies in the general population.

**Fig. S5a, S5b Baujat plot for studies included in the meta-analysis.** The horizontal axis indicates the contribution of each study to the overall heterogeneity (measured by Cochran's Q), therefore studies on the right-hand side increase the heterogeneity more. The vertical axis indicates the influence of each study on the pooled proportion. Studies at the top have a greater influence on the pooled result..

Fig. S5a. Baujat plot for studies included in the meta-analysis of *pfhrp3* deletions among samples from health facilities.

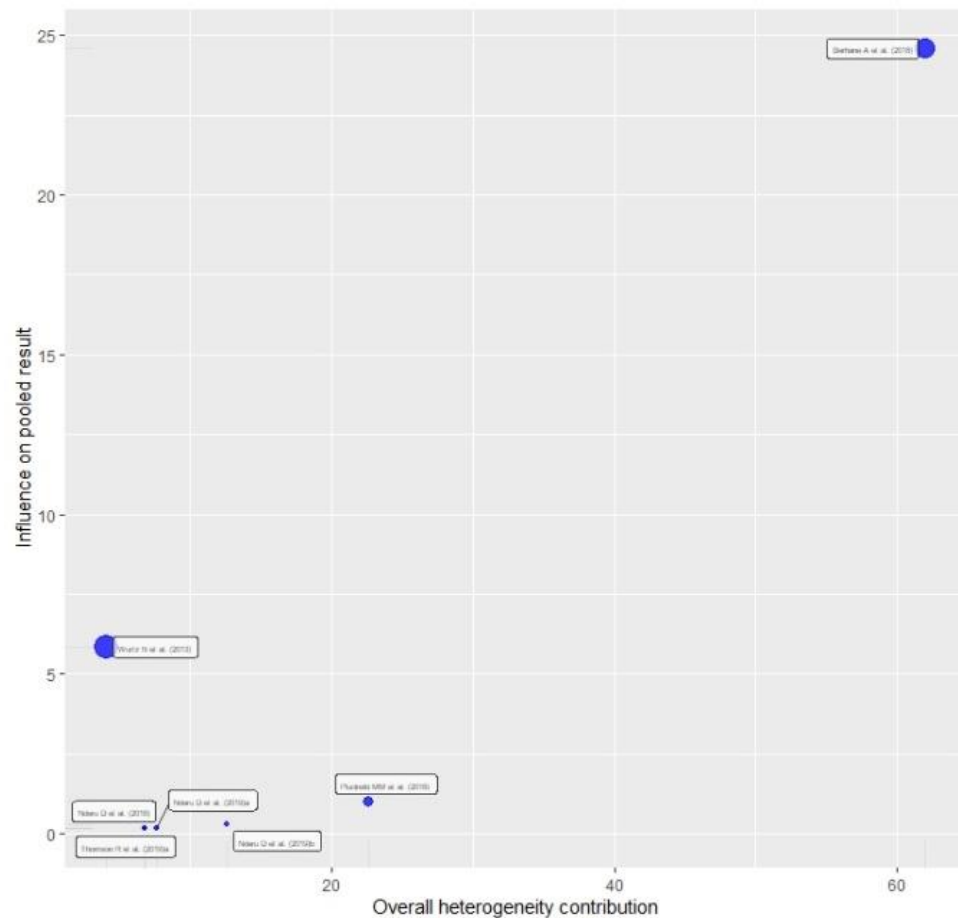

Fig. S5b. Baujat plot for studies included in the meta-analysis of *pfhrp3* deletions among samples from the general population.

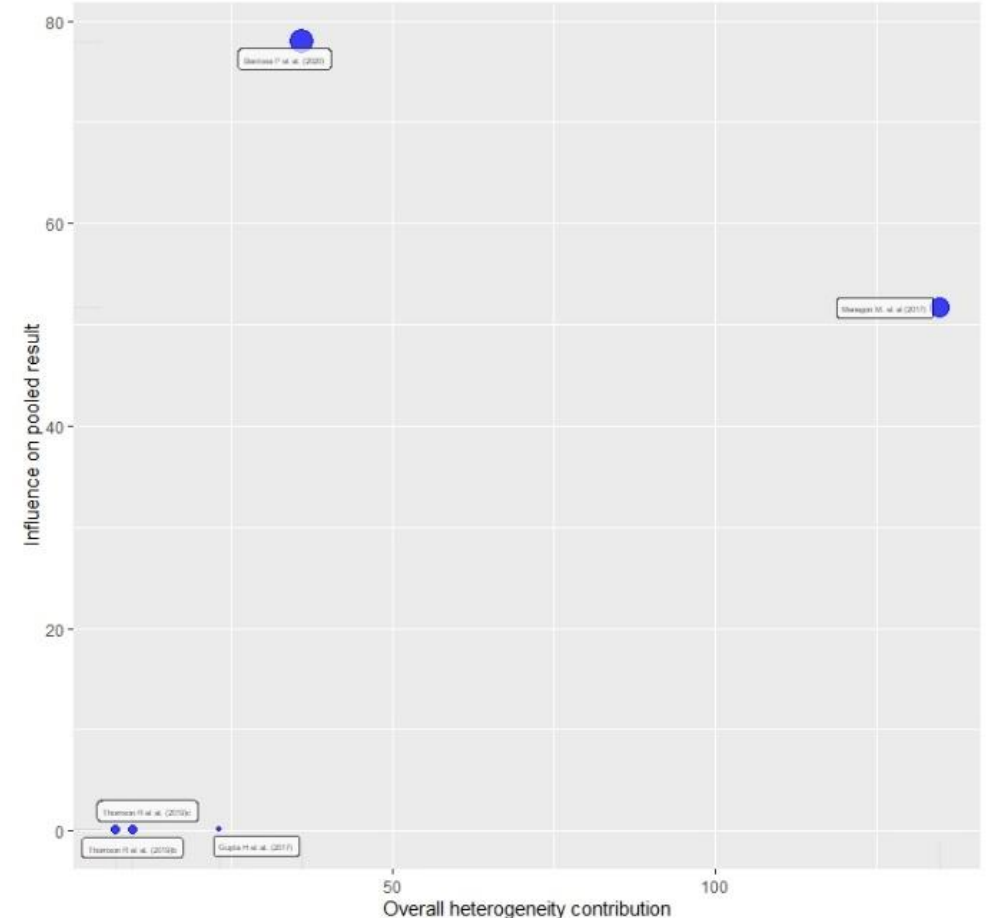

**Fig. S5c, S5d. Forest plot for *pfhrp3* deletion prevalence according to the outliers analysis.** All results whose confidence interval did not overlap with the prediction interval were excluded. These articles had a relative weight of 0%.

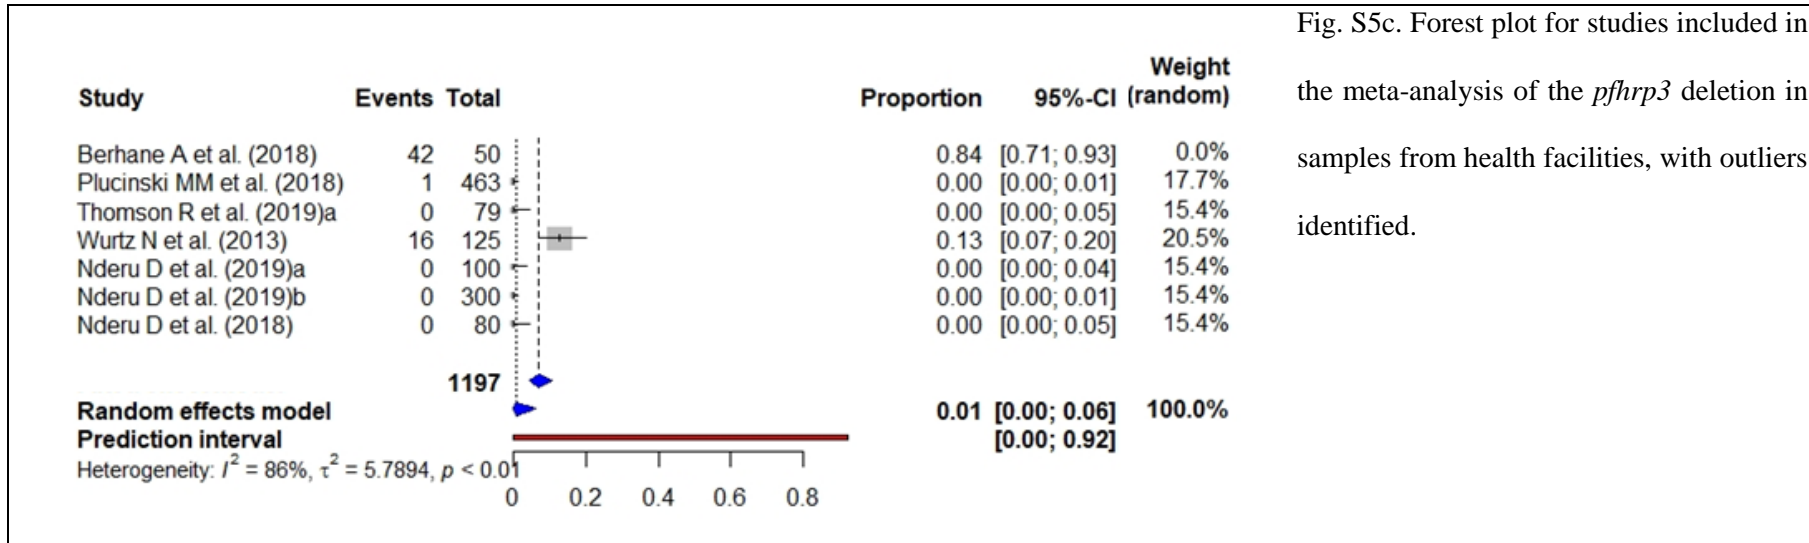

Fig. S5c. Forest plot for studies included in the meta-analysis of the *pfhrp3* deletion in samples from health facilities, with outliers identified.

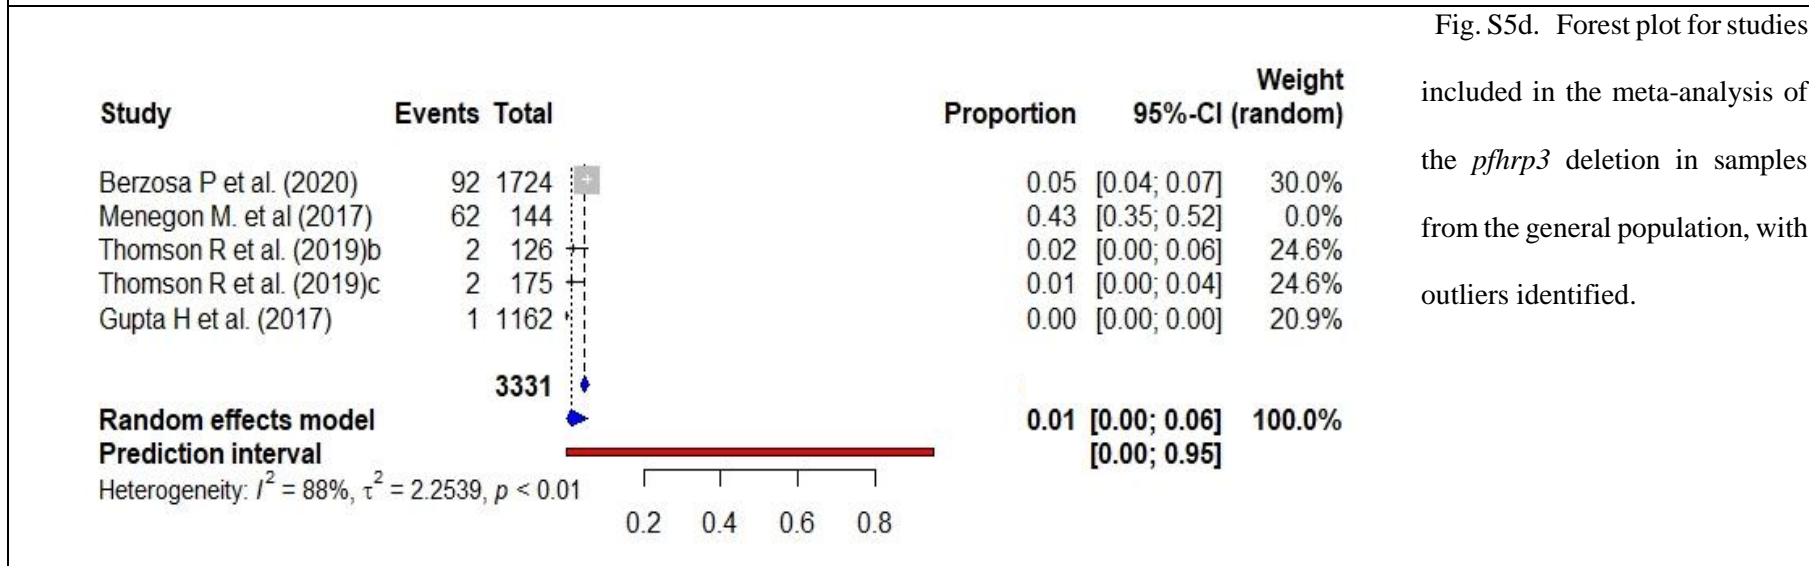

Fig. S5d. Forest plot for studies included in the meta-analysis of the *pfhrp3* deletion in samples from the general population, with outliers identified.
